# Supplementary material for: The Genetic Polymorphisms of HLA Are Strongly Correlated with the Disease Severity after Hantaan Virus Infection in the Chinese Han Population
Source: Hindawi journal article supplement (doi:10.1155/2012/308237), 2012-01-01
Supplement: f1 [file 308237.f1.pdf]

Table S1. Phenotype frequencies of HLA-A, HLA-B, and HLA-DRB1 alleles

| Allele | HFRS patients |               |                 | Controls |
|--------|---------------|---------------|-----------------|----------|
|        | Total         | Mild/Moderate | Severe/Critical |          |
|        | AF(%)         | AF(%)         | AF(%)           | AF(%)    |
| HLA-A  |               |               |                 |          |
| *01    | 9.21          | 11.43         | 7.32            | 8.65     |
| *02    | 47.37         | 45.71         | 46.34           | 50.27    |
| *03    | 9.21          | 5.71          | 12.20           | 7.84     |
| *11    | 34.21         | 31.43         | 36.59           | 32.70    |
| *23    | 1.32          | 2.86          | -               | 0.81     |
| *24    | 22.37         | 28.57         | 14.63           | 31.89    |
| *26    | 3.95          | 2.86          | 4.88            | 4.59     |
| *30    | 10.53         | 17.14         | 2.44            | 13.78    |
| *31    | 6.58          | 5.71          | 7.32            | 7.30     |
| *32    | 11.84         | 8.57          | 14.63           | 7.30     |
| *33    | 15.79         | 14.29         | 17.07           | 12.97    |
| *29    | 1.32          | 2.86          | -               | 1.08     |
| HLA-B  |               |               |                 |          |
| *07    | 9.46          | 11.76         | 7.50            | 7.57     |
| *13    | 17.57         | 26.47         | 7.50            | 21.89    |
| *15    | 21.62         | 26.47         | 17.50           | 26.49    |

|     |       |       |       |       |
|-----|-------|-------|-------|-------|
| *18 | 2.70  | 5.88  | -     | 1.35  |
| *27 | 2.70  | 2.94  | 2.50  | 5.14  |
| *35 | 10.81 | 17.65 | 5.00  | 11.62 |
| *37 | 1.35  | 2.94  | -     | 3.24  |
| *38 | 4.05  | 5.88  | 2.50  | 5.14  |
| *40 | 21.62 | 17.65 | 25.00 | 23.51 |
| *41 | 2.70  | 2.94  | 2.50  | -     |
| *44 | 10.81 | 5.88  | 15.00 | 10.00 |
| *46 | 24.32 | 8.82  | 37.50 | 15.95 |
| *48 | 6.76  | 11.76 | 2.50  | 5.68  |
| *50 | 1.35  | -     | 2.50  | 3.24  |
| *51 | 17.57 | 14.71 | 20.00 | 10.54 |
| *52 | 8.11  | 2.94  | 12.50 | 8.65  |
| *54 | 6.76  | 2.94  | 10.00 | 6.49  |
| *55 | 2.70  | -     | 5.00  | 5.41  |
| *56 | 1.35  | 2.94  | -     | 1.08  |
| *57 | 4.05  | -     | 7.50  | 4.32  |
| *58 | 10.81 | 11.76 | 10.00 | 8.92  |
| *81 | 1.35  | 2.94  | -     | -     |
| *62 | 2.70  | 5.88  | -     | -     |
| *67 | 1.35  | -     | 2.50  | 2.16  |

---

HLA-DRB1

|     |       |       |       |       |
|-----|-------|-------|-------|-------|
| *01 | 4.17  | 3.13  | 5.00  | 6.76  |
| *03 | 11.11 | 9.38  | 12.50 | 8.65  |
| *04 | 20.83 | 9.38  | 30.00 | 24.05 |
| *07 | 29.17 | 37.50 | 22.50 | 22.70 |
| *08 | 13.89 | 18.75 | 10.00 | 8.92  |
| *09 | 38.89 | 34.38 | 42.50 | 22.70 |
| *11 | 11.11 | 15.63 | 7.50  | 15.68 |
| *12 | 12.50 | 18.75 | 7.50  | 24.05 |
| *13 | 5.56  | 9.38  | 2.50  | 9.19  |
| *14 | 9.72  | 12.50 | 7.50  | 12.97 |
| *15 | 25.00 | 12.50 | 35.00 | 30.00 |
| *16 | 5.56  | 3.13  | 7.50  | 1.89  |

---

HLA, human leukocyte antigen; AF, allele frequency (as percentage); HFRS, hemorrhagic fever with renal syndrome.
